# Supplementary material for: A triphenylene-based conjugated microporous polymer: construction, gas adsorption, and fluorescence detection properties
Source: Royal Society of Chemistry journal article supplement (doi:10.1039/c4ra13696a), 2015-01-01
Supplement: c4ra13696a1.pdf [file c4ra13696a1.pdf]

## **Electronic Supplementary Information**

# **A Triphenylene-based Conjugated Microporous Polymer: Construction, Gas Adsorption, and Fluorescent Detection Properties**

Jie Han\*, Xia Fan, Zhan-Zhong Zhuang, Wei-Chao Song, Ze Chang\*, Ying-Hui Zhang\* and Xian-He Bu

Department of Chemistry, Tianjin Key Lab on Metal & Molecule-Based Material Chemistry, Key Laboratory of Advanced Energy Materials Chemistry (MOE), and Collaborative Innovation Center of Chemical Science and Engineering (Tianjin), Nankai University, Tianjin 300071, China

\*To whom correspondence should be addressed

1. General
2. Synthesis of TP-CMP
3. IR spectrum of TP-CMP
4. TGA trace and DSC profile of TP-CMP
5. Powder X-ray diffraction of TP-CMP
6. Isothermic heat of H<sub>2</sub> and CO<sub>2</sub> adsorption
7. Adsorption selectivity of CO<sub>2</sub> over N<sub>2</sub>
8. Fluorescence response of TP-CMP dispersed in DMF to the addition of different solvents

## 1. General

Solid-state NMR experiment was carried on a Varian Infinityplus-400 wide-bore (89 mm) NMR spectrometer at a proton frequency of 399.7 MHz using a 5 mm double-resonance HX CP/MAS NMR probe. IR spectra were measured using a Bio-Rad FTS-6000 spectrometer with KBr pellets. The powder X-ray diffraction spectra were recorded on a Bruker D8 FOCUS diffractometer at 40 kV/40 mA. Thermogravimetric analysis was carried out on a NETZSCH TG 209 analyzer with a heating rate of 10 °C min<sup>-1</sup> from ambient temperature to 800 °C under a nitrogen atmosphere. The scanning electron microscopy experiments were carried out on a JEOL JSM-6701F microscope operated at 5 kV. The solid state photoluminescent spectra were measured on a Hitachi F-4500 fluorescence spectrophotometer. The fluorescence of the suspension of TP-CMP was measured by dispersing 3 mg of grounded sample in 2 mL DMF and subsequently placed in a quartz cell of 1 cm width. All titrations were carried out by gradually adding nitrobenzene in an incremental fashion. Their corresponding fluorescence emission spectra were recorded with  $\lambda_{\text{ex}} = 300$  nm at 298 K. Low-pressure gas adsorption measurements were performed using an ASAP 2020 M gas adsorption analyzer. UHP-grade gases were used in the measurements. The N<sub>2</sub> isotherm measurements were carried out at 77 K in a liquid nitrogen bath and 273 K in an ice water mixture bath. The H<sub>2</sub> sorption isotherms were collected at 77 K in a liquid nitrogen bath and 87 K in a liquid argon bath. The CO<sub>2</sub> and CH<sub>4</sub> sorption isotherms were collected at 273 K in an ice water mixture bath and 298 K in an electric heating jacket. The dry samples were loaded into sample tubes and activated under high vacuum (less than 10<sup>-5</sup> Torr) at 180 °C. The apparent surface areas were calculated from nitrogen adsorption data by multipoint BET analysis. The apparent micropore distributions were calculated from nitrogen adsorption data by the NLDFT method using a cylindrical pore size model for pillared clay.

## 2. Synthesis of TP-CMP

TP-CMP was synthesized in a similar procedures to literature.<sup>[1]</sup> A mixture of 2,3,6,7,10,11-hexabromotriphenylene<sup>[2]</sup> (150 mg, 0.21 mmol) and 1,4-benzene diboronic acid (106 mg, 0.63 mmol) in dimethylformamide (DMF, 15 mL) was degassed for 15 min. To the mixture was added an aqueous solution of K<sub>2</sub>CO<sub>3</sub> (2.0 M, 1.6 mL) and tetrakis(triphenylphosphine) palladium(0) (24.7 mg). The mixture was stirred at 150 °C for 24 h under N<sub>2</sub>, and then was cooled to room temperature and poured into water. The resultant precipitate was collected by filtration and further washed by Soxhlet extractions for 24 h sequentially with water, dichloromethane, and methanol, respectively. The solids were dried under vacuum at 60 °C for 8 h to give TP-CMP (94 mg) as a gray solid in quantitative yield.

### References:

- [1] L. Chen, Y. Honsho, S. Seki, D. Jiang, *J. Am. Chem. Soc.* **2010**, 132, 6742-6748.
- [2] R. Breslow, B. Jaus, R. Q. Kluttz, C.-Z. Xia, *Tetrahedron*, **1982**, 38, 863-867.

### 3. IR spectrum of TP-CMP

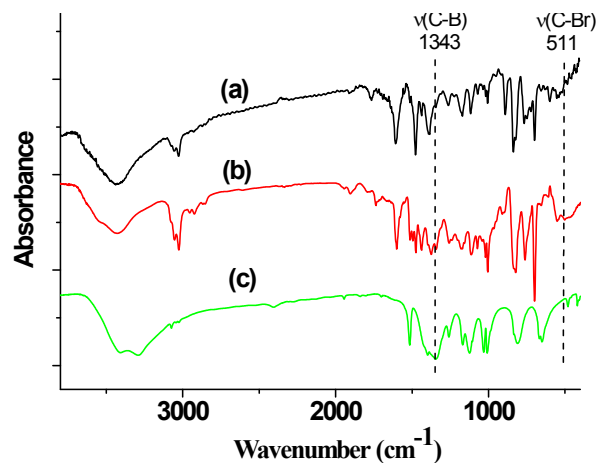

Figure S1. FTIR spectra of (a) **TP-CMP**, (b) 2,3,6,7,10,11-hexabromotriphenylene and (c) 1,4-benzene diboronic acid

### 4. TGA trace and DSC profile of TP-CMP

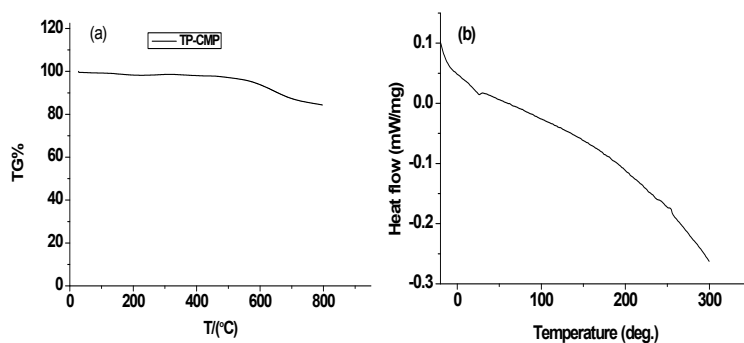

Figure S2. TGA trace (a) and DSC profile (b) of **TP-CMP**

### 5. Powder X-ray diffraction of TP-CMP

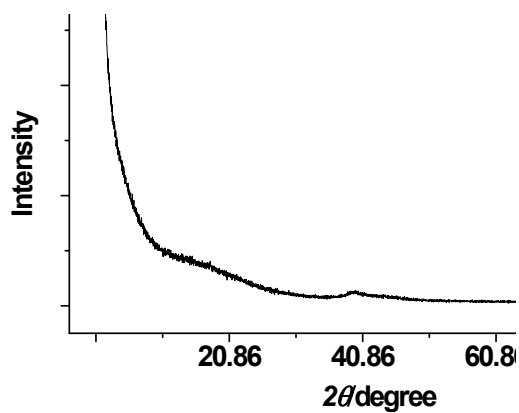

Figure S3. Powder X-ray diffraction of **TP-CMP**

## 6. Isosteric heat of $\text{H}_2$ and $\text{CO}_2$ adsorption

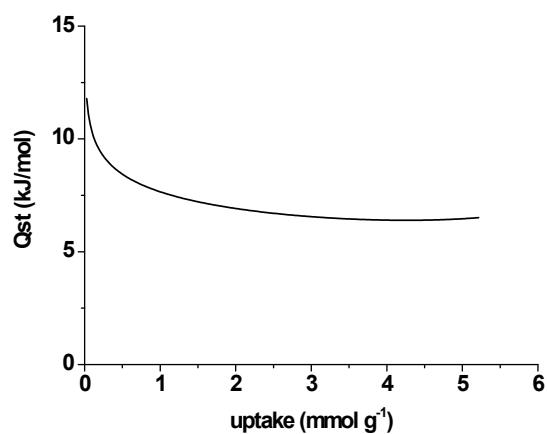

Figure S4. Plot of the isosteric heat of adsorption of  $\text{H}_2$  versus the uptake amount of  $\text{H}_2$ .

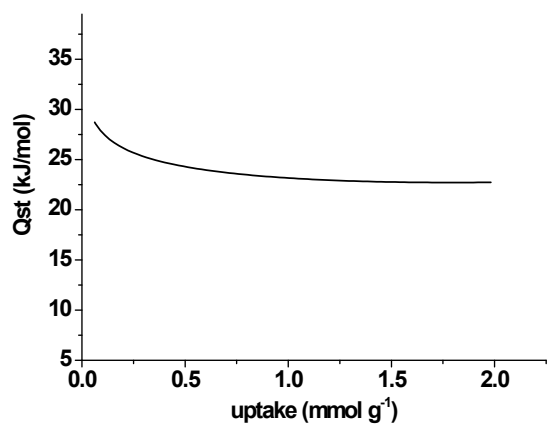

Figure S5. Plot of the isosteric heat of adsorption of  $\text{CO}_2$  versus the uptake amount of  $\text{CO}_2$ .

## 7. Adsorption selectivity of $\text{CO}_2$ over $\text{N}_2$

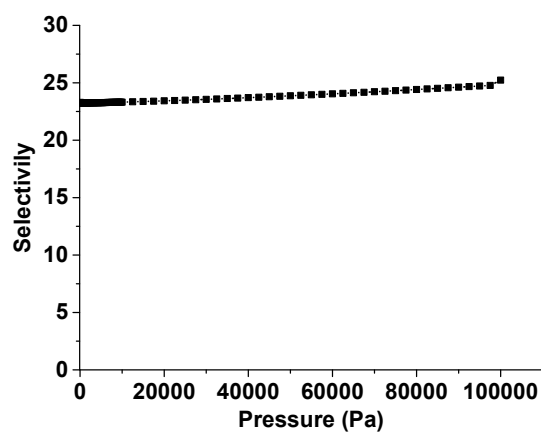

Figure S6. Plot of the adsorption selectivity of  $\text{CO}_2/\text{N}_2$  at a composition of 15%  $\text{CO}_2$  and 85%  $\text{N}_2$  at 273 K.

## 8. Fluorescence response of TP-CMP dispersed in DMF upon the addition of different solvents

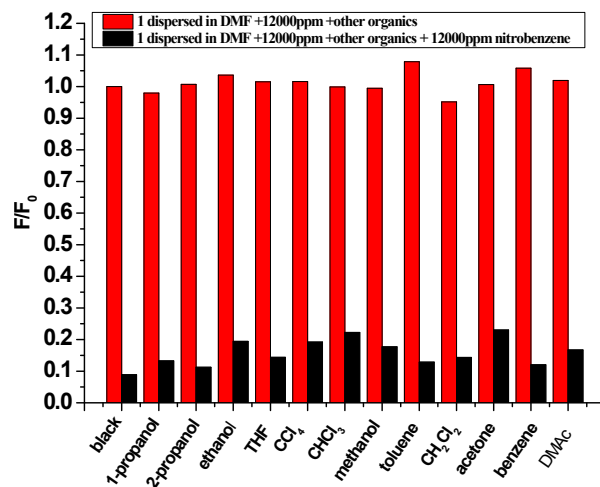

Figure S7 Fluorescence intensity ratio histograms of **TP-CMP** dispersed in DMF on the addition of different solvents with (black) and without (red) nitrobenzene. Emission intensities at 475 nm were selected.
